# Supplementary figures and images for: Towards resolving Lamiales relationships: insights from rapidly evolving chloroplast sequences
Source: Springer Nature journal article supplement (doi:10.1186/1471-2148-10-352), 2010-01-01

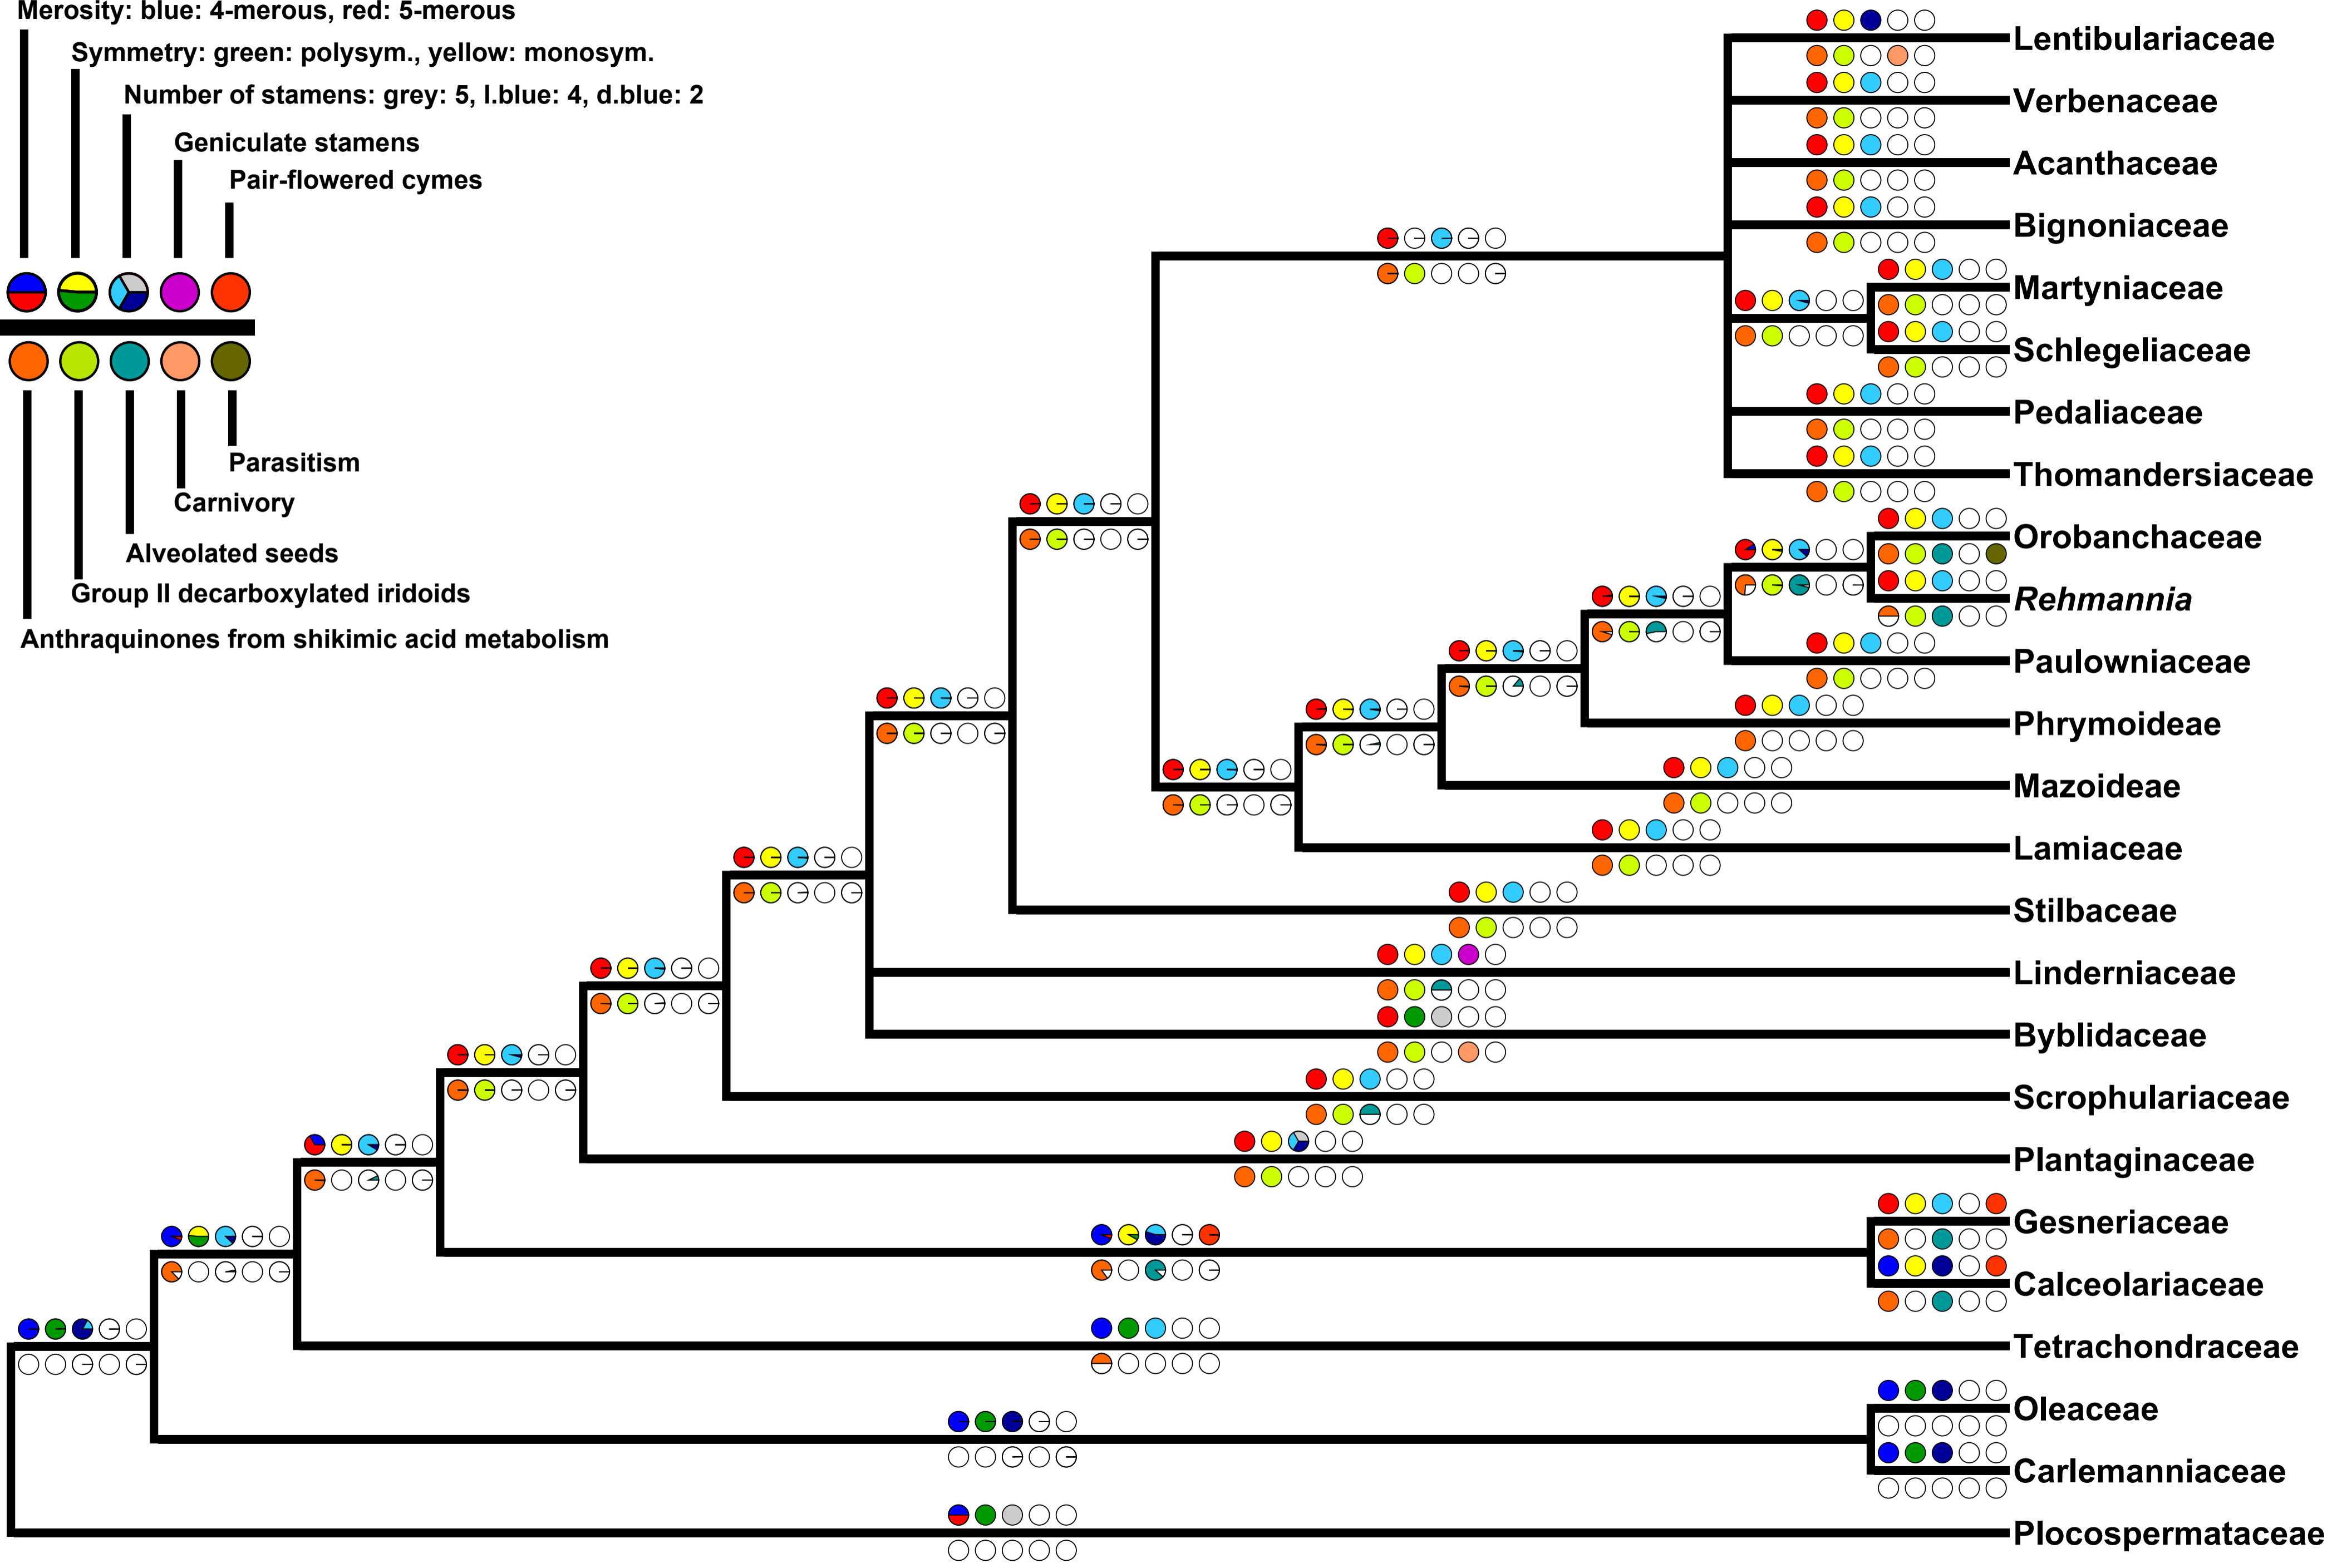

Supplement: 12862_2010_1567_MOESM10_ESM.pdf [file 12862_2010_1567_MOESM10_ESM.pdf]

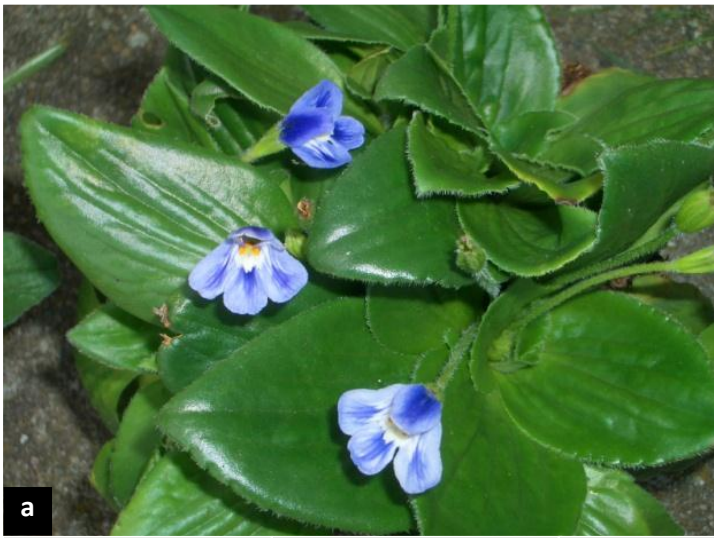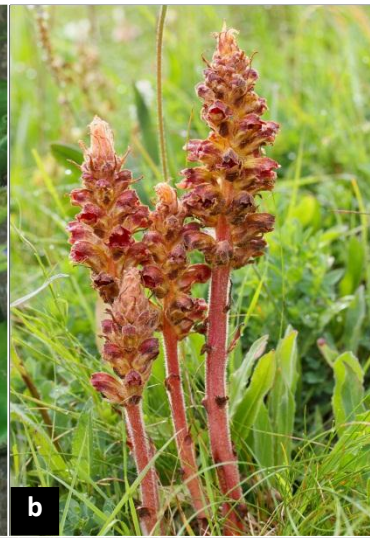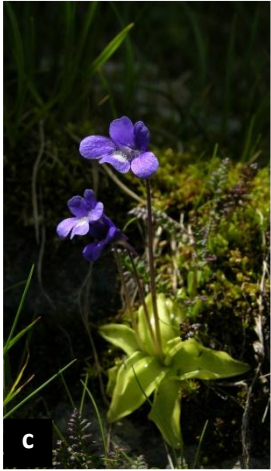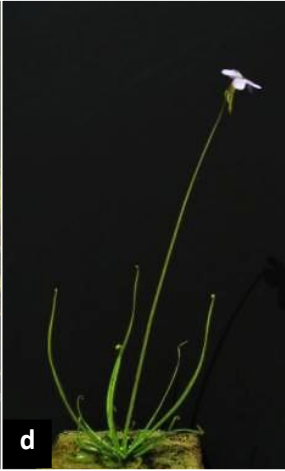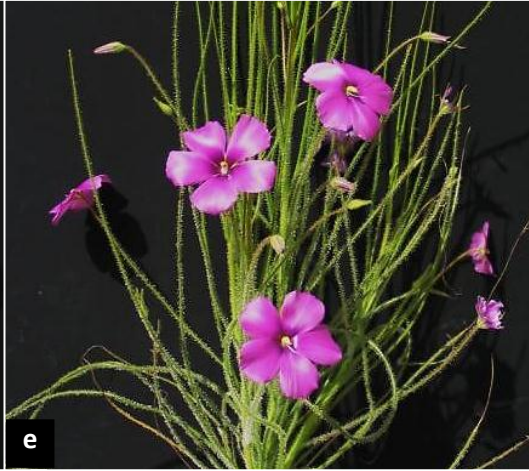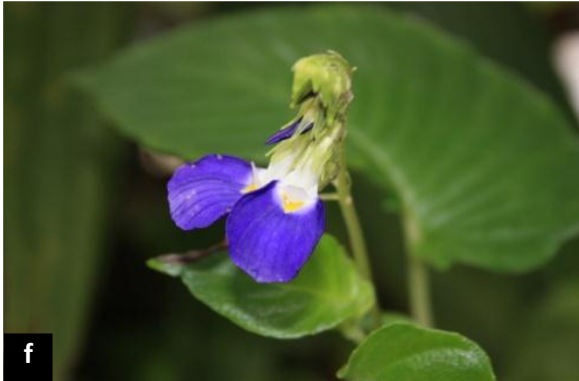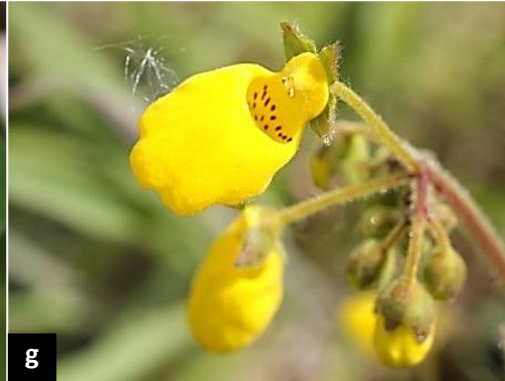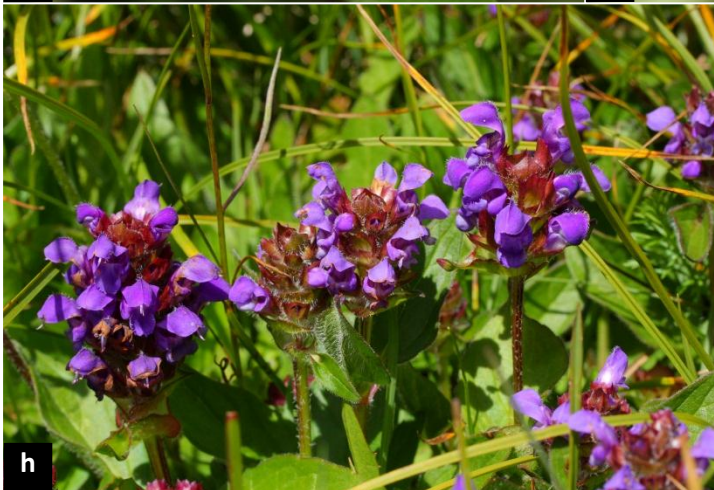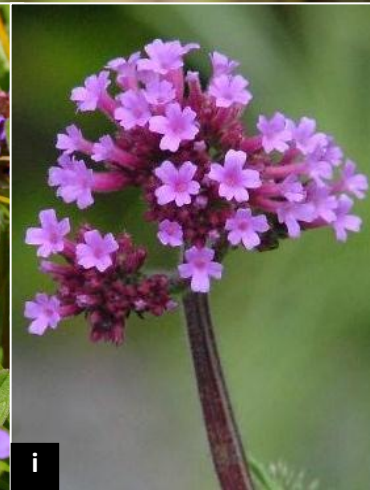

Supplement: 12862_2010_1567_MOESM7_ESM.pdf [file 12862_2010_1567_MOESM7_ESM.pdf]

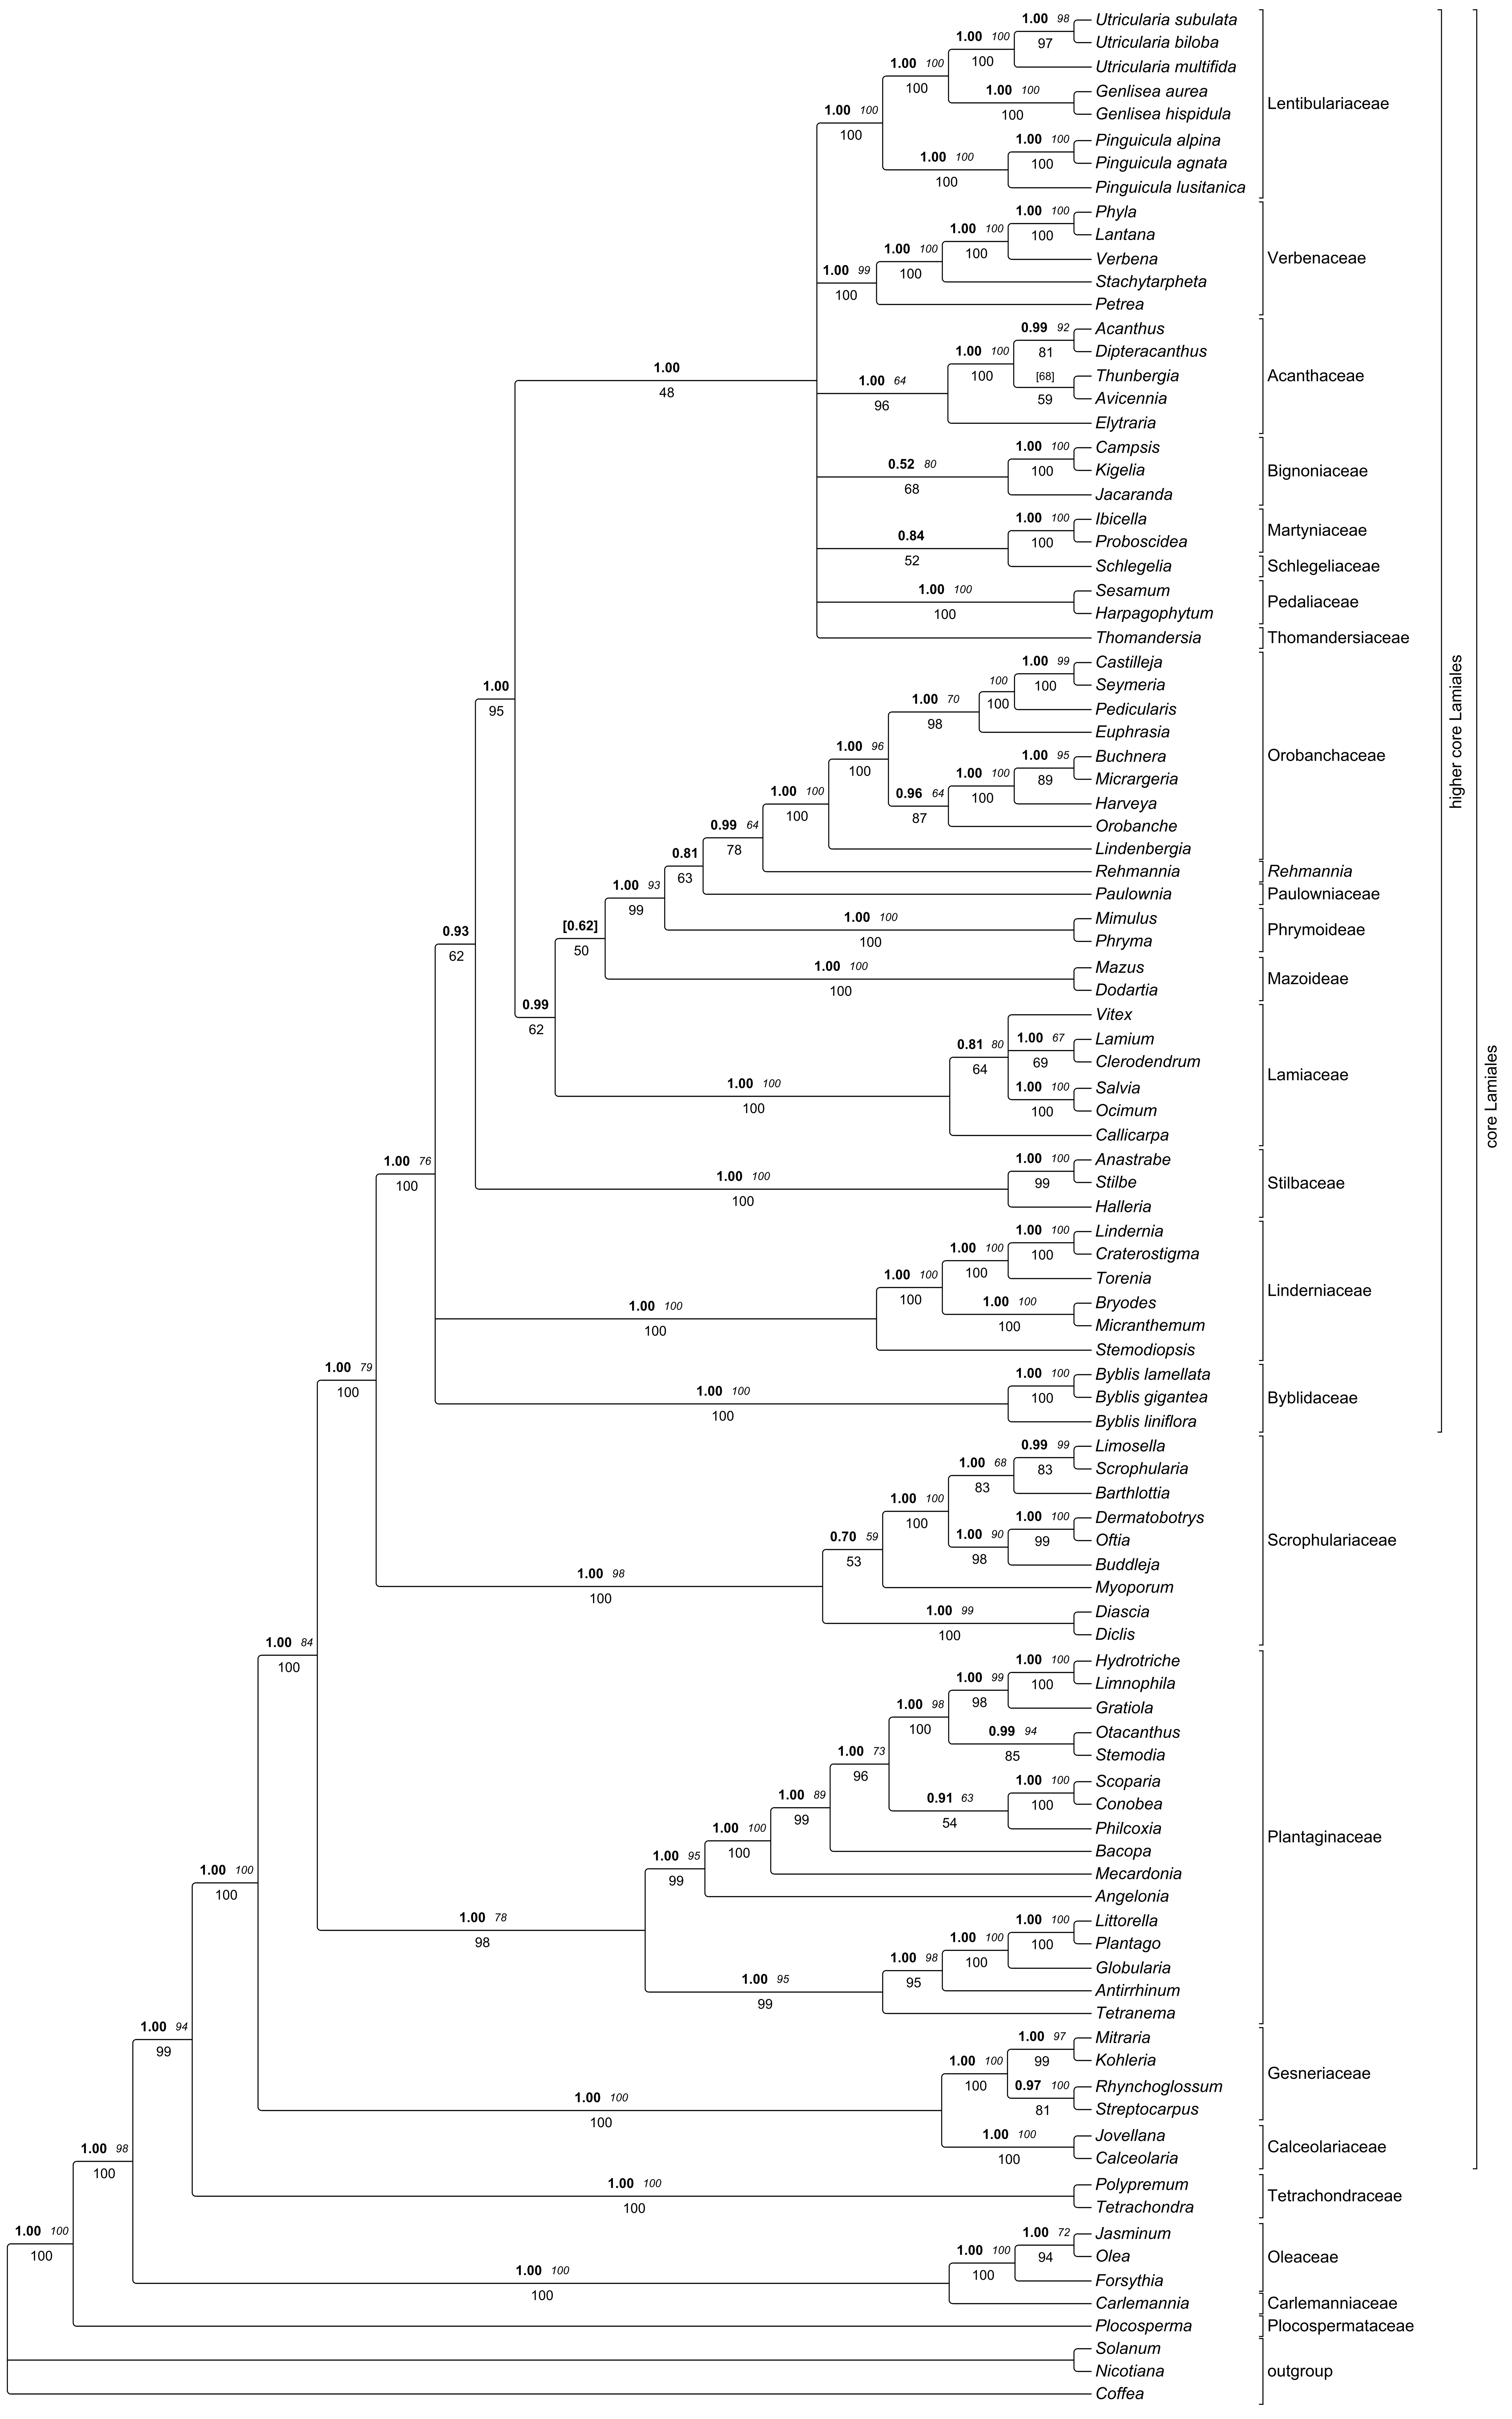

Supplement: 12862_2010_1567_MOESM8_ESM.pdf [file 12862_2010_1567_MOESM8_ESM.pdf]

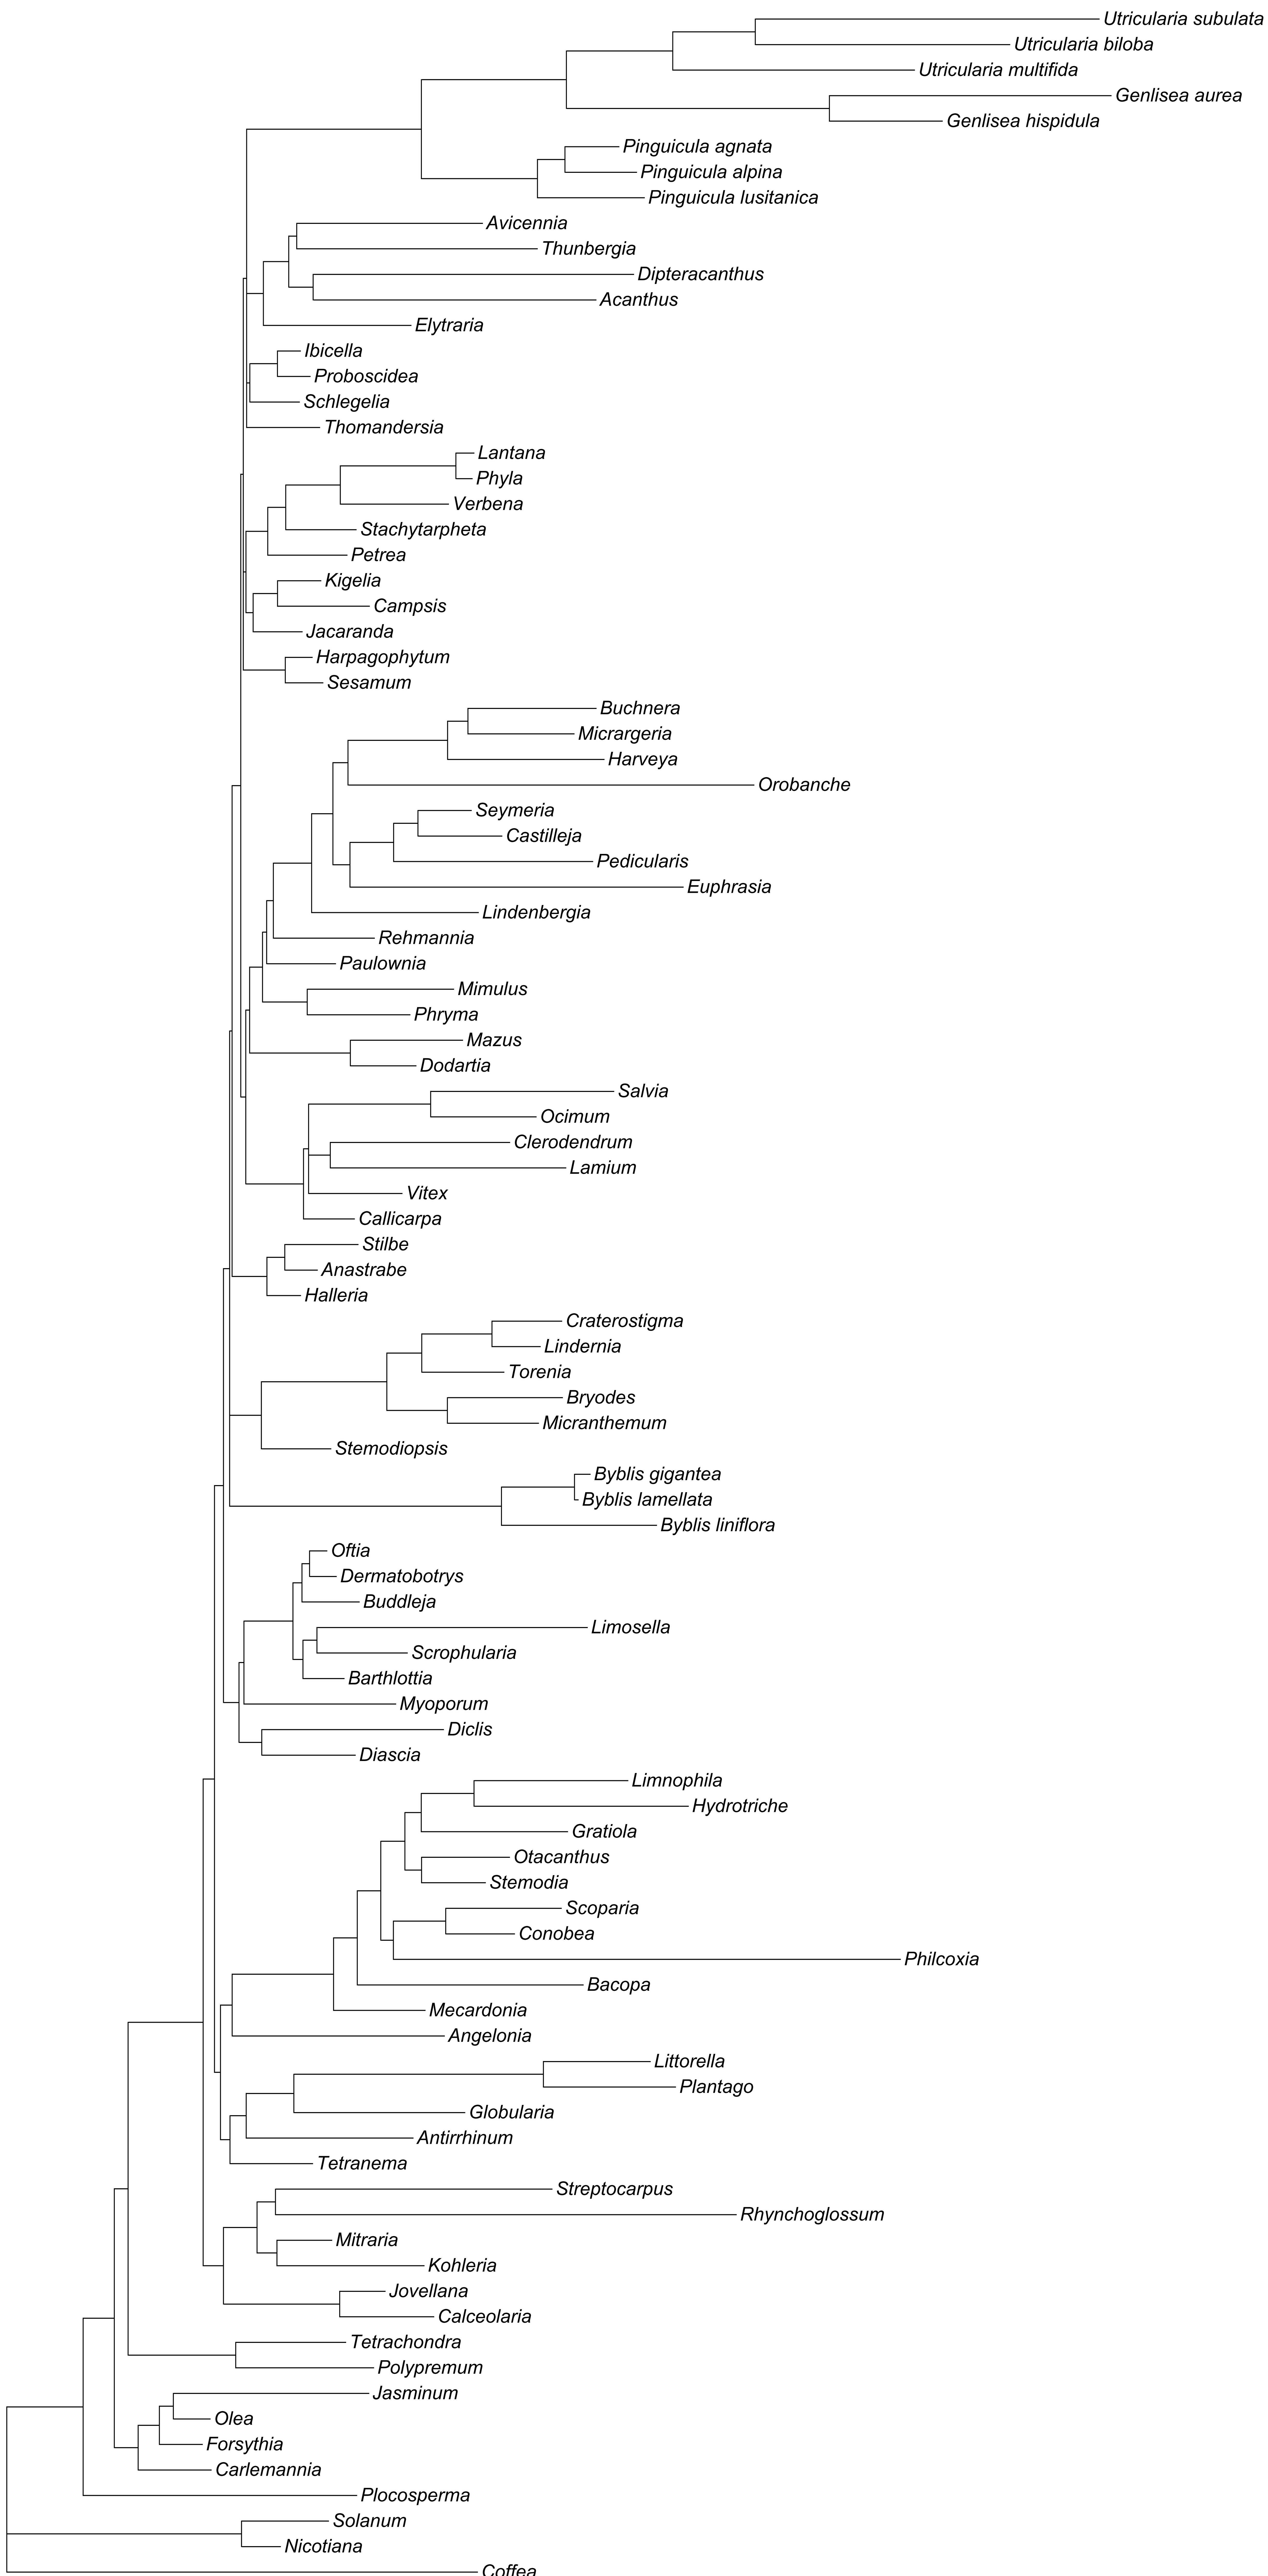

0.0 0.05 0.1 0.15 0.2 0.25  
substitutions per site

Supplement: 12862_2010_1567_MOESM9_ESM.pdf [file 12862_2010_1567_MOESM9_ESM.pdf]
